# Supplementary material for: Low-temperature vapor reduction of graphene oxide electrodes for vertical organic field-effect transistors
Source: Royal Society of Chemistry journal article supplement (doi:10.1039/d3tc04217k), 2023-11-30
Supplement: d3tc04217k1.pdf [file d3tc04217k1.pdf]

## Supporting Information

### Low-temperature vapor reduction of graphene oxide electrodes for vertical organic field-effect transistors

*Kun Qiao<sup>a</sup>, Qing Ma<sup>a</sup>, Junjia Wang<sup>a</sup>, Binghao Wang<sup>a\*</sup>*

<sup>a</sup>School of Electronic Science & Engineering, Southeast University, 2 Sipailou Road,  
Nanjing, Jiangsu Province, 210096 P. R. China

\* Email: binghaowang@seu.edu.cn

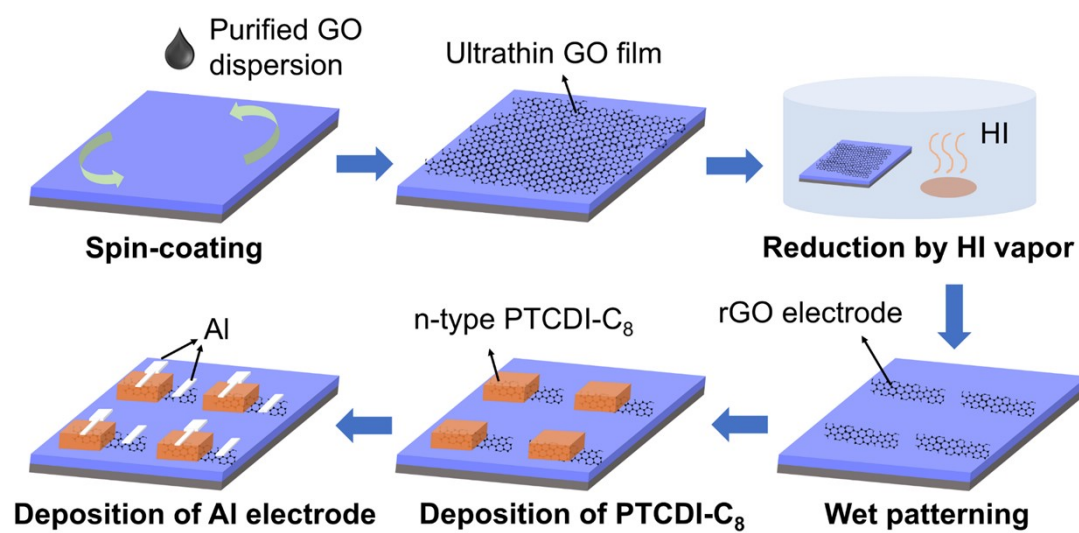

**Figure S1.** Schematic of the device fabrication process.

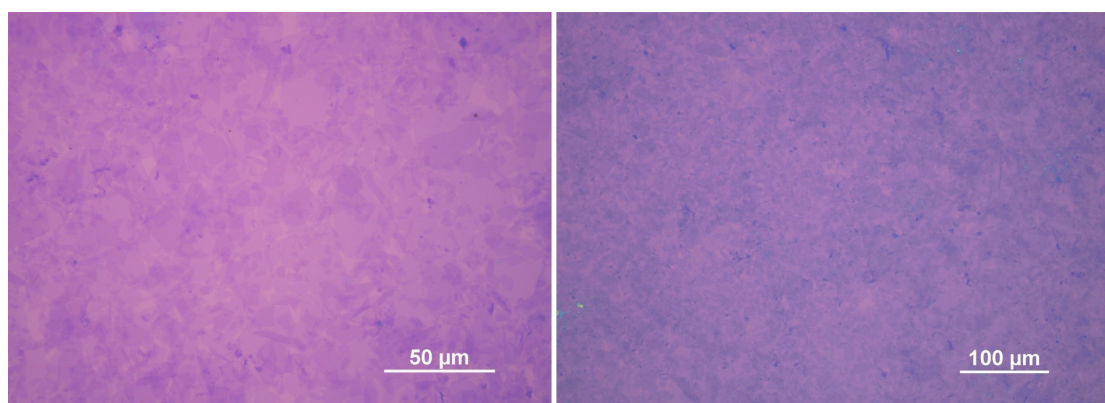

**Figure S2.** Optical images of the rGO films.

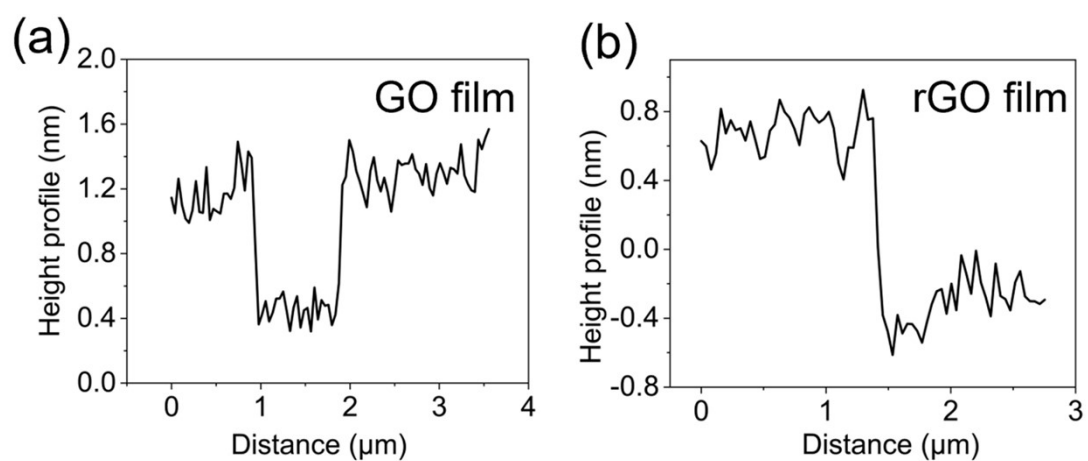

**Figure S3.** Height profile of the (a) spin-coated GO and (b) rGO film.

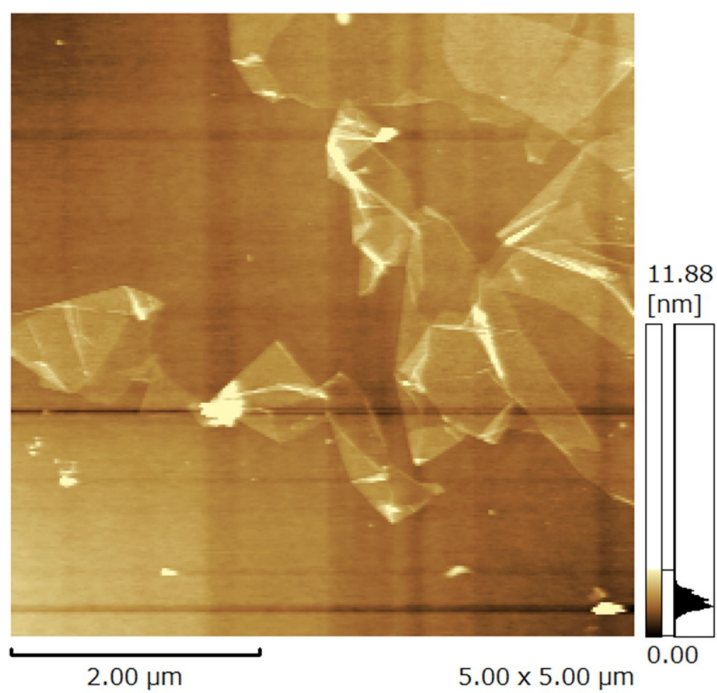

**Figure S4.** AFM image of the rGO film reduced by dipping in HI solution.

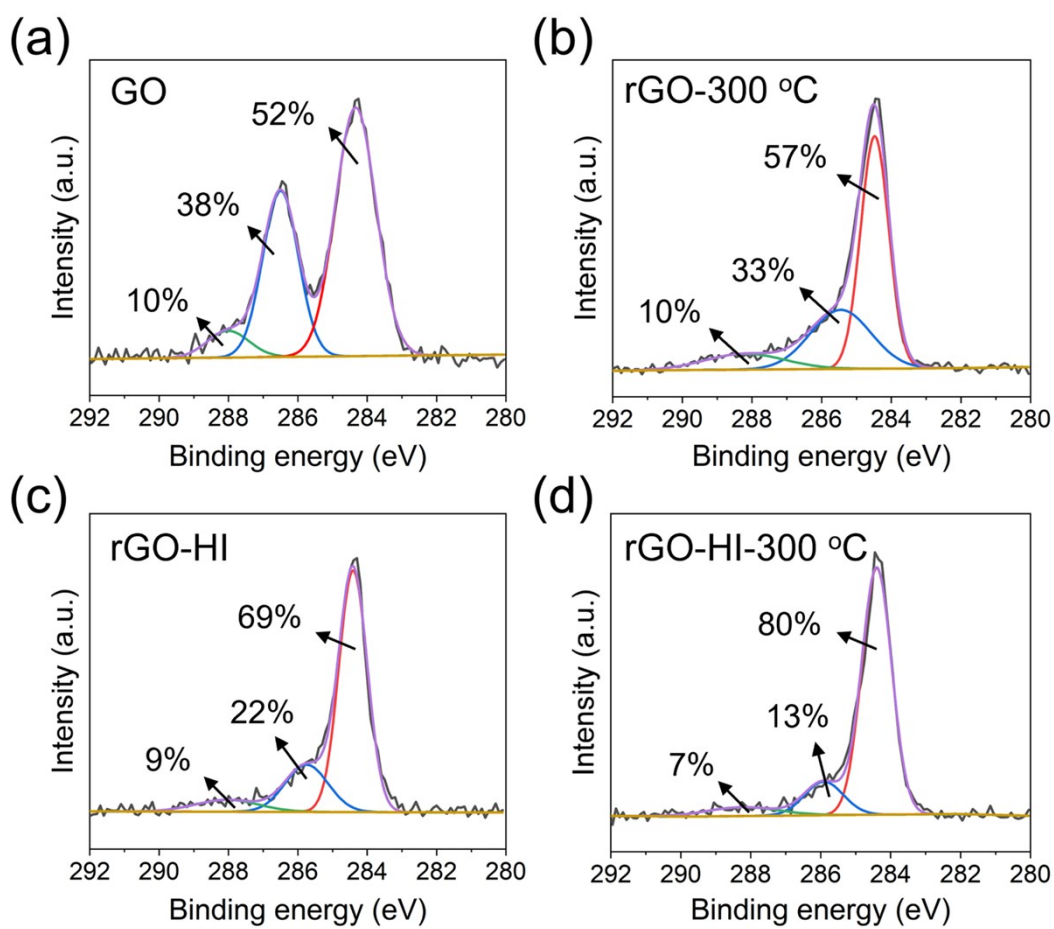

**Figure S5.** C1s XPS spectra of the (a) GO, (b) rGO-300 °C, (c)rGO-HI and (d) rGO-HI-300 °C, respectively.

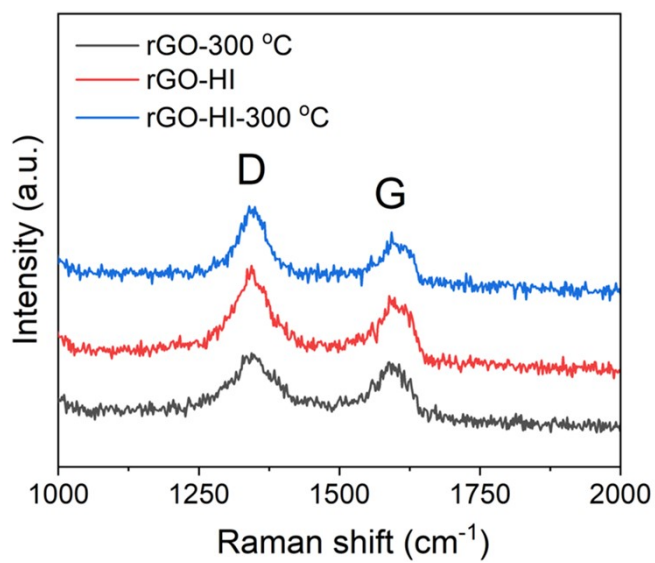

**Figure S6.** Raman spectra of the rGO-300 °C, rGO-HI, and rGO-HI-300 °C respectively.
